# Supplementary material
Source: HighWire-hosted journal article supplement (https://bmjopen.bmj.com/content/8/3/e019656)
Supplement: inline-supplementary-material-1 [file inline-supplementary-material-1.pdf]

## Appendix 1

Search Name: CENTRAL repeat search- limited 2014-2017

Last Saved: 28/02/2017 14:50:03.214

Description: 28/02/17

ID Search

#1 MeSH descriptor: [Myocardial Ischemia] explode all trees

#2 (myocard\* near isch\*mi\*):ti,ab,kw

#3 isch\*mi\* near heart:ti,ab,kw

#4 MeSH descriptor: [Coronary Artery Bypass] explode all trees

#5 myocard\* near infarct\*:ti,ab,kw

#6 heart near infarct\*:ti,ab,kw

#7 angina:ti,ab,kw

#8 coronary near (disease\* or bypass or thrombo\* or angioplast\*):ti,ab,kw

#9 MeSH descriptor: [Percutaneous Coronary Intervention] explode all trees

#10 (percutaneous next coronary near/2 (interven\* or revascular\*))

#11 MeSH descriptor: [Angioplasty] explode all trees

#12 angioplast\*

#13 ((coronary or arterial) near/4 dilat\*)

#14 endoluminal next repair\*

#15 MeSH descriptor: [Stents] explode all trees

#16 stent\*

#17 pci or ptca

#18 MeSH descriptor: [Atherectomy] explode all trees

#19 atherectom\*

#20 acute next coronary next syndrom\*

#21 (#1or#2or#3or#4or#5or#6or#7or#8)

#22 #1or#2or#3or#4or#5or#6or#7or#8or#9or#10or#11 or #12 or #13 or #14 or #15 or #16

or #17 or #18 or #19 or #20

#23 MeSH descriptor: [Exercise Therapy] explode all trees

#24 MeSH descriptor: [Sports] explode all trees

#25 MeSH descriptor: [Physical Exertion] explode all trees

#26 rehabilitat\*:ti,ab,kw

#27 (physical\* near (fit\* or train\* or therap\* or activit\*)):ti,ab,kw

#28 MeSH descriptor: [Exercise] explode all trees

#29 (train\*) near (strength\* or aerobic\* or exercise\*):ti,ab,kw

#30 ((exercise\* or fitness) near/3 (treatment or intervent\* or program\*)):ti,ab,kw

#31 MeSH descriptor: [Rehabilitation] explode all trees

#32 kinesiotherap\*:ti,ab,kw  
#33 MeSH descriptor: [Physical Education and Training] explode all trees  
#34 MeSH descriptor: [Patient Education as Topic] explode all trees  
#35 (patient\* near/5 educat\*)  
#36 ((lifestyle or life-style) near/5 (interven\* or program\* or treatment\*))  
#37 MeSH descriptor: [Self Care] explode all trees  
#38 (self near/5 (manag\* or care or motivate\*))  
#39 MeSH descriptor: [Psychotherapy] explode all trees  
#40 psychotherap\*  
#41 (psycholog\* near/5 intervent\*)  
#42 MeSH descriptor: [Counseling] explode all trees  
#43 (counselling or counseling)  
#44 ((behavior\* or behaviour\*) near/5 (modify or modificat\* or therap\* or change))  
#45 (psycho-educat\* or psychoeducat\*)  
#46 (motivat\* near/5 (intervention or interv\*))  
#47 MeSH descriptor: [Health Education] explode all trees  
#48 (health near/5 educat\*)  
#49 (psychosocial or psycho-social)  
#50 (cognitive near/2 behav\*)  
#51 #23or#24or#25or#26or#27or#28or#29or#30or#31or #32 or #33  
#52 #23or#24or#25or#26or#27or#28or#29or#30or#31 or #32 or #33 or #34 or #35 or #36  
or #37 or #38 or #39 or #40 or #41 or #42 or #43 or #44 or #45 or #46 or #47 or #48 or #49 or #50  
#53 #21 and #51  
#54 #22 and #52  
#55 #54 not #53  
#56 #53 Publication Year from 2014 to 2017  
#57 #55 or #56  
#58 #51 and #21  
#59 #57 and #58 Publication Year from 2014 to 2017
